# Supplementary material
Source: PubMed Central journal article supplement (PMC5119006)
Supplement: AAC.01275-16_zac012165752so1.pdf [file AAC.01275-16_zac012165752so1.pdf]

## Supplementary information for:

### **A novel genome editing platform for drug resistant *Acinetobacter baumannii* revealed an AdeR-unrelated tigecycline resistance mechanism**

Vincent Trebosc<sup>1,2</sup>, Sarah Gartenmann<sup>1</sup>, Kevin Royet<sup>1</sup>, Pablo Manfredi<sup>2</sup>, Marcus Tötzl<sup>1</sup>, Birgit Schellhorn<sup>1</sup>, Michel Pieren<sup>1</sup>, Marcel Tigges<sup>1</sup>, Sergio Lociuro<sup>1</sup>, Peter C. Sennhenn<sup>1</sup>, Marc Gitzinger<sup>1</sup>, Dirk Bumann<sup>2</sup>, and Christian Kemmer<sup>1#</sup>

<sup>1</sup> BioVersys AG, Basel, Switzerland

<sup>2</sup> Biozentrum, University of Basel, Basel, Switzerland

Running title: Genome editing platform for drug resistant *A. baumannii*

# Corresponding author: Christian Kemmer [christian.kemmer@bioversys.com](mailto:christian.kemmer@bioversys.com)

Keywords: multidrug resistance, knockout, knockin, efflux pumps, *adeABC*, *trm*.

#### **Table of content:**

**Figure S1:** Development of artificial tigecycline resistance in *A. baumannii* using serial passages.

**Table S1:** Oligonucleotides used in this study.

**Table S2:** Antibiotic resistance profile of the *in vitro* evolved tigecycline resistant strains and their parental strains.

**Table S3:** Important mutations identified by whole genome sequencing of *in vitro* evolved tigecycline resistant strains.

**Table S4:** Tigecycline resistance profile of the *trm* knockout and *trm* restored strains.

**Figure S1: Development of artificial tigecycline resistance in *A. baumannii* using serial passages.** Strain ATCC-17978 and its  $\Delta adeR$  mutant were grown for 12 days in medium containing indicated tigecycline concentrations. The cells were passaged every 48h into fresh medium containing a duplication in the tigecycline concentration. The artificially evolved tigecycline resistant strains derived from strain *A. baumannii* ATCC-17978 and its  $\Delta adeR$  mutant were designated ATCC-17978(TGC) and ATCC-17978 $\Delta adeR$ (TGC), respectively. The figure was produced, in part, by using Servier Medical Art.

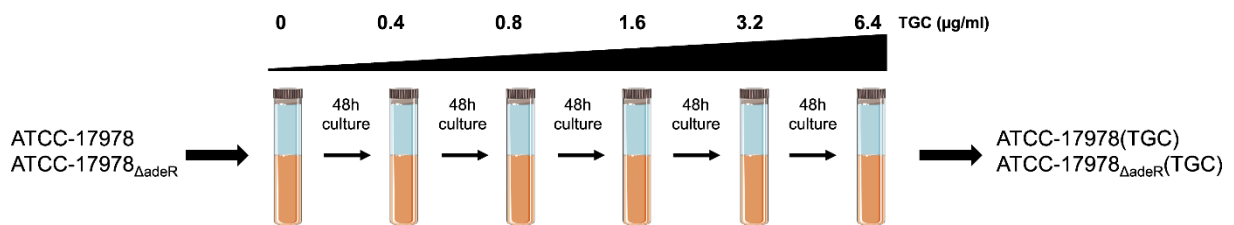

**Table S1: Oligonucleotides used in this study.**

| Oligo name | Sequence (5'-3')                                                                       |
|------------|----------------------------------------------------------------------------------------|
| oVT01      | GGCGCGCCCTGTCAGACCAAGTTTACTC                                                           |
| oVT02      | GGCCGGCCTATCAGCTCACTCAAAGG                                                             |
| oVT05      | ACTGACTTTAGCCGGTGGTG                                                                   |
| oVT08      | GTTTTCCAGTCACGACGC                                                                     |
| oVT93      | GCAGCTTGTAGGCGTTCATAC                                                                  |
| oVT94      | AACTTGCTCAATACGACGGC                                                                   |
| oVT106     | TTTTAATATTATCCCGGGAGAAAATCTGGCTATAGAAAAGTG                                             |
| oVT107     | GCCAGATTTTCTCCCGGATAATATTAATAAATAGCTAGGGAATATTTTATG                                    |
| oVT113     | CCGCTCGAGCCTAGGGAATTCAAAGAGGAGAAAATGGCACAGCTATATTTCTACTATTCCGC                         |
| oVT114     | AACTGCAGAAGCTTGGCGGCCAACCCCTTGGGGCTCTAAACGGGTCTTGAGGGGTTTTTTGTTAATCGTGCCGA<br>TGCCTTTC |
| oVT134     | TTTTTGCGGCCATTGGTGAG                                                                   |
| oVT141     | CATTTTCTCCTCTTTGTATTTCGCGCGCCGCG                                                       |
| oVT142     | CGCGGCCGCGGAATACAAAGAGGAGAAAATG                                                        |
| oVT149     | AATTGAGGCCTCTCGAGGAATTCGAGCTCGGTACCCGGGGATCCTCTAGAGCCTGCAGGAAGCTTCG                    |
| oVT150     | GGCCCGAAGCTTCTCGAGGCTCTAGAGGATCCCGGGTACCGAGCTCGAATTCCTCGAGAGGCCTC                      |
| oVT151     | AAAAGAGAGTGAGGGGGCAC                                                                   |
| oVT154     | GGAGAATTGAGGCCTCTCGAGTGACCTTCAGTGACAAAAG                                               |
| oVT155     | AGCTTCTCGAGGCTCTAGATTTAAGAACTTTTTCAACTACCG                                             |
| oVT160     | ACTGCCATAACCCACACCAGC                                                                  |
| oVT161     | CCCATTTCATCTTCGGGCTCA                                                                  |
| oVT312     | AAGGAGAGTTGACACAGCTG                                                                   |
| oVT412     | AGAATTGAGGCCTCTCGAGGAATTCGCACCTGCACCTAAAAGC                                            |
| oVT413     | CTGGTCTTGCCCGGGGAGAAAACCGACTGATATAC                                                    |
| oVT414     | GGTTTTCTCCCCGGGCAAGACCAGTTGCCGATC                                                      |
| oVT415     | CCGCAAGCTTCTCGAGGCTCTAGACGCTGTGCCCGTTATAATG                                            |
| oVT416     | GAGGAATTCGAGCTCGGTACCTTACAAAAACGGCAAGCC                                                |
| oVT417     | CCGCAAGCTTCTCGAGGCTCTAGAAGCAATCATCACGTCCAG                                             |
| oVT423     | GGCTACTACAGGAGCAGCAG                                                                   |
| oVT424     | CTACTTTGATGGCGGCGTTG                                                                   |
| adeB-qRT-F | GGATTATGGCGACAGAAGGA                                                                   |
| adeB-qRT-R | AATACTGCCCCAATACCAG                                                                    |
| rpoD-qRT-F | GAGTCTAATGGCGGTGGTTC                                                                   |
| rpoD-qRT-R | ATTGCTTCATCTGCTGGTTG                                                                   |

**Table S2: Antibiotic resistance profile of the in vitro evolved tigecycline resistant strains and their parental strains.**

| MIC ( $\mu\text{g/ml}$ )         | Tigecycline | Tetracycline | Meropenem | Ciprofloxacin | Gentamycin |
|----------------------------------|-------------|--------------|-----------|---------------|------------|
| ATCC-17978                       | 0.4         | 2            | 0.5       | 0.5           | 2          |
| ATCC-17978(TGC)                  | 25          | 32           | 0.5       | 2             | 0.5        |
| ATCC-17978 $\Delta_{adeR}$       | 0.4         | 2            | 0.25      | 0.25          | 1          |
| ATCC-17978 $\Delta_{adeR}$ (TGC) | 6.3         | 64           | 0.5       | 4             | 0.5        |

**Table S3: Important mutations identified by whole genome sequencing of in vitro evolved tigecycline resistant strains.**

| Mutated gene or region                                                                                        | Mutations                                                                     |                                                                                         | Protein function                                                                            | References |
|---------------------------------------------------------------------------------------------------------------|-------------------------------------------------------------------------------|-----------------------------------------------------------------------------------------|---------------------------------------------------------------------------------------------|------------|
|                                                                                                               | ATCC-17978(TGC)                                                               | ATCC-17978 $\Delta_{adeR}$ (TGC)                                                        |                                                                                             |            |
| <i>trm</i> (A1S_2858)                                                                                         | IS-17 like transposon inserted in the coding sequence                         | Adenine in position 311 of <i>trm</i> deleted leading to early stop codon               | Methyltransferase potentially involved in rRNAs methylation                                 | (1)        |
| <i>RNase E</i> (A1S_0403)                                                                                     | 58 bp deletion in the coding sequence                                         | -                                                                                       | Ribonuclease involved in rRNAs processing and RNA decay                                     | (2)        |
| Intergenic region between <i>RNase E</i> (A1S_0403) and <i>23S rRNA pseudouridylylate synthase</i> (A1S_0404) | IS <i>Aba11</i> element inserted at position 439,336 in the intergenic region | -                                                                                       | RNase E see above. 23S rRNA pseudouridylylate synthase involved in modification of 23S rRNA | (3)        |
| <i>adeN</i> (A1S_1979)                                                                                        | -                                                                             | IS <i>Aba11</i> transposon inserted in the coding sequence                              | Transcriptional repressor of the <i>adeIJK</i> efflux pump                                  | (4)        |
| <i>abeM</i> (A1S_0395)                                                                                        | -                                                                             | Cytosine to thymidine mutation (position 429,259) in the promoter region of <i>abeM</i> | MATE family efflux pump                                                                     | (5)        |
| <i>rpsJ</i> (A1S_3081)                                                                                        | -                                                                             | S12F substitution in the coding sequence                                                | 30S ribosomal protein S10 part of tigecycline binding site in the ribosome                  | (6, 7)     |

**Table S4: Tigecycline resistance profile of the *trm* knockout and *trm* restored strains.**

| Tigecycline MIC ( $\mu\text{g/ml}$ ) | <i>trm</i> knockout |                | <i>trm</i> wildtype recovery |             |       |             |       |             |
|--------------------------------------|---------------------|----------------|------------------------------|-------------|-------|-------------|-------|-------------|
|                                      | ATCC-17978          |                | BV185                        |             | BV186 |             | BV191 |             |
|                                      | WT                  | $\Delta_{trm}$ | WT                           | <i>trm+</i> | WT    | <i>trm+</i> | WT    | <i>trm+</i> |
|                                      | 0.4                 | 0.8            | 3.1                          | 1.6         | 3.1   | 1.6         | 12.5  | 6.3         |

## References:

1. **Morić I, Savić M, Ilić-Tomić T, Vojnović S, Bajkić S, Vasiljević B.** 2010. rRNA Methyltransferases and their Role in Resistance to Antibiotics. *J Med Biochem* **29**:165–174.
2. **Mackie GA.** 2013. RNase E: at the interface of bacterial RNA processing and decay. *Nat Rev Microbiol* **11**:45–57.
3. **Gutgsell NS, Deutscher MP, Ofengand J.** 2005. The pseudouridine synthase RluD is required for normal ribosome assembly and function in *Escherichia coli*. *RNA N Y N* **11**:1141–1152.
4. **Rosenfeld N, Bouchier C, Courvalin P, Périchon B.** 2012. Expression of the resistance-nodulation-cell division pump AdeIJK in *Acinetobacter baumannii* is regulated by AdeN, a TetR-type regulator. *Antimicrob Agents Chemother* **56**:2504–2510.
5. **Su X-Z, Chen J, Mizushima T, Kuroda T, Tsuchiya T.** 2005. AbeM, an H<sup>+</sup>-coupled *Acinetobacter baumannii* multidrug efflux pump belonging to the MATE family of transporters. *Antimicrob Agents Chemother* **49**:4362–4364.
6. **Schedlbauer A, Kaminishi T, Ochoa-Lizarralde B, Dhimole N, Zhou S, López-Alonso JP, Connell SR, Fucini P.** 2015. Structural characterization of an alternative mode of tigecycline binding to the bacterial ribosome. *Antimicrob Agents Chemother* **59**:2849–2854.
7. **Beabout K, Hammerstrom TG, Perez AM, Magalhães B de F, Prater AG, Clements TP, Arias CA, Saxer G, Shamoo Y.** 2015. The ribosomal S10 protein is a general target for decreased tigecycline susceptibility. *Antimicrob Agents Chemother*.
